# Supplementary material
Source: PubMed Central journal article supplement (PMC8095091)
Supplement: NIHMS1693948-supplement-Supplement.pdf [file NIHMS1693948-supplement-Supplement.pdf]

| Supplementary Table 1. Ninety-five Percent Confidence Intervals. Age-adjusted Mortality From non-Prescription Opioids (ICD Codes T40.1 (Heroin) and 40.4 (Other opioids). Florida Counties with Available Data. 1999-2016. |           |       |           |       |           |       |
|----------------------------------------------------------------------------------------------------------------------------------------------------------------------------------------------------------------------------|-----------|-------|-----------|-------|-----------|-------|
| County                                                                                                                                                                                                                     | 1999-2004 |       | 2005-2010 |       | 2011-2016 |       |
|                                                                                                                                                                                                                            | Lower     | Upper | Lower     | Upper | Lower     | Upper |

## Supplement 1

### ICD Codes Used for Prescription Opioid Measures

F11 (Mental and behavioral disorders due to use of opioids), T40.2 (Other opioids), and Y45.0 (Opioids and related analgesics). An expanded list of these opioid codes includes: F11.0 (Mental and behavioral disorders due to use of opioids, acute intoxication), F11.1 (Mental and behavioral disorders due to use of opioids, harmful use), F11.2 (Mental and behavioral disorders due to use of opioids, dependence syndrome), F11.3 (Mental and behavioral disorders due to use of opioids, withdrawal state), F11.4 (Mental and behavioral disorders due to use of opioids, withdrawal state with delirium), F11.5 (Mental and behavioral disorders due to use of opioids, psychotic disorder), F11.6 (Mental and behavioral disorders due to use of opioids, amnesic syndrome), F11.7 (Mental and behavioral disorders due to use of opioids, residual and late-onset psychotic disorder), F11.8 (Mental and behavioral disorders due to use of opioids, other mental and behavioral disorders), F11.9 (Mental and behavioral disorders due to use of opioids, unspecified mental and behavioral disorder), T40.2 (Other opioids), and Y45.0 (Opioids and related analgesics).

|                          | Bound<br>95%<br>Confidence<br>Interval | Bound<br>95%<br>Confidence<br>Interval           | Bound<br>95%<br>Confidence<br>Interval | Bound<br>95%<br>Confidence<br>Interval | Bound<br>95%<br>Confidence<br>Interval | Bound<br>95%<br>Confidence<br>Interval |
|--------------------------|----------------------------------------|--------------------------------------------------|----------------------------------------|----------------------------------------|----------------------------------------|----------------------------------------|
| Alachua County, FL       | <i>0.8</i>                             | <i>2.3</i>                                       | <i>0.5</i>                             | <i>1.8</i>                             | <i>1.1</i>                             | <i>2.7</i>                             |
| Bay County, FL           | 2.4                                    | 5                                                | 1.9                                    | 4.3                                    | 3.8                                    | 6.8                                    |
| Brevard County, FL       | 1.2                                    | 2.2                                              | 0.8                                    | 1.6                                    | <b>1.9</b>                             | <b>3.2</b>                             |
| Broward County, FL       | 2.3                                    | 2.9                                              | <b>0.9</b>                             | <b>1.3</b>                             | <b>3.4</b>                             | <b>4.2</b>                             |
| Citrus County, FL        | <i>1.3</i>                             | <i>4.4</i>                                       | <i>1</i>                               | <i>3.7</i>                             | 1.7                                    | 4.9                                    |
| Collier County, FL       | 1.4                                    | 3                                                | 0.7                                    | 1.9                                    | <b>4</b>                               | <b>6.4</b>                             |
| Duval County, FL         | 0.5                                    | 1                                                | 0.7                                    | 1.2                                    | <b>7</b>                               | <b>8.5</b>                             |
| Escambia County, FL      | <i>0.4</i>                             | <i>1.3</i>                                       | 0.8                                    | 2                                      | <b>2.6</b>                             | <b>4.4</b>                             |
| Hernando County, FL      | 2.3                                    | 5.5                                              | 1                                      | 3.1                                    | 1.2                                    | 3.5                                    |
| Hillsborough County, FL  | 2.3                                    | 3.1                                              | <b>1.3</b>                             | <b>1.9</b>                             | <b>2.3</b>                             | <b>3</b>                               |
| Lake County, FL          | 1                                      | 2.6                                              | 0.6                                    | 1.7                                    | 1                                      | 2.4                                    |
| Leon County, FL          | <i>0.4</i>                             | <i>1.5</i>                                       | n/a                                    | n/a                                    | <i>0.6</i>                             | <i>1.6</i>                             |
| Manatee County, FL       | 2.7                                    | 4.9                                              | 2.6                                    | 4.5                                    | <b>16</b>                              | <b>20.2</b>                            |
| Marion County, FL        | <i>0.7</i>                             | <i>2</i>                                         | <i>0.6</i>                             | <i>1.7</i>                             | <b>2.1</b>                             | <b>3.9</b>                             |
| Martin County, FL        | <i>0.9</i>                             | <i>3.2</i>                                       | <i>1.4</i>                             | <i>4</i>                               | 1.9                                    | 5.1                                    |
| Miami-Dade County, FL    | 1.6                                    | 2.1                                              | 1.3                                    | 1.7                                    | <b>2.7</b>                             | <b>3.3</b>                             |
| Orange County, FL        | 2.1                                    | 3                                                | <b>1.2</b>                             | <b>1.8</b>                             | 4.7                                    | 5.7                                    |
| Osceola County, FL       | 1.5                                    | 3.4                                              | 2.3                                    | 1.5                                    | <b>3.7</b>                             | <b>5.8</b>                             |
| Palm Beach County, FL    | 1.4                                    | 2.1                                              | <b>0.6</b>                             | <b>1</b>                               | <b>6</b>                               | <b>7.2</b>                             |
| Pasco County, FL         | 1.4                                    | 2.7                                              | 0.7                                    | 1.5                                    | <b>1.7</b>                             | <b>3</b>                               |
| Pinellas County, FL      | 2.9                                    | 4                                                | <b>0.9</b>                             | <b>1.5</b>                             | <b>1.8</b>                             | <b>2.6</b>                             |
| Polk County, FL          | 0.6                                    | 1.3                                              | 0.4                                    | 1                                      | 1.8                                    | 2.6                                    |
| St. Lucie County, FL     | <i>0.9</i>                             | <i>2.5</i>                                       | <i>0.7</i>                             | <i>1.9</i>                             | <b>2.5</b>                             | <b>4.5</b>                             |
| Sarasota County, FL      | 2.2                                    | 4.1                                              | 2                                      | 3.6                                    | <b>7.1</b>                             | <b>10.1</b>                            |
| Seminole County, FL      | 1.1                                    | 2.2                                              | 1.4                                    | 2.5                                    | <b>4.5</b>                             | <b>6.3</b>                             |
| Volusia County, FL       | 0.8                                    | 1.7                                              | 1.7                                    | 2.9                                    | <b>4.2</b>                             | <b>5.9</b>                             |
| <b>KEY: ITALIC 14 pt</b> | <b>ITALIC</b>                          | < 20 deaths                                      |                                        |                                        |                                        |                                        |
| <b>Bold 11 pt</b>        | <b>11111111</b>                        | significant decline from 1999-2004 to 2005-2010  |                                        |                                        |                                        |                                        |
| <b>Bold 14 pt</b>        | <b>222222</b>                          | Significant increase from 2005-2010 to 2011-2016 |                                        |                                        |                                        |                                        |
